# Supplementary material
Source: PubMed Central journal article supplement (PMC7903239)
Supplement: advancesADV2020002567-suppl1.pdf [file advancesADV2020002567-suppl1.pdf]

Supplemental figure. Kaplan-Meier curves for Progression-free survival (A) and Overall survival (B) by treatment arm for groups classified according to IPI (Arm A: R-CHOP, Arm B: RW-CHOP)

Figure S1A

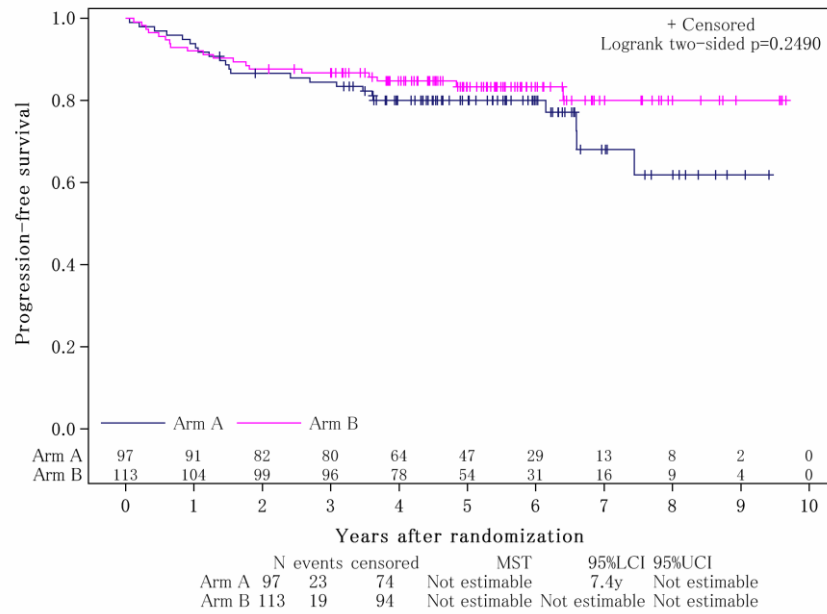

Figure S1B

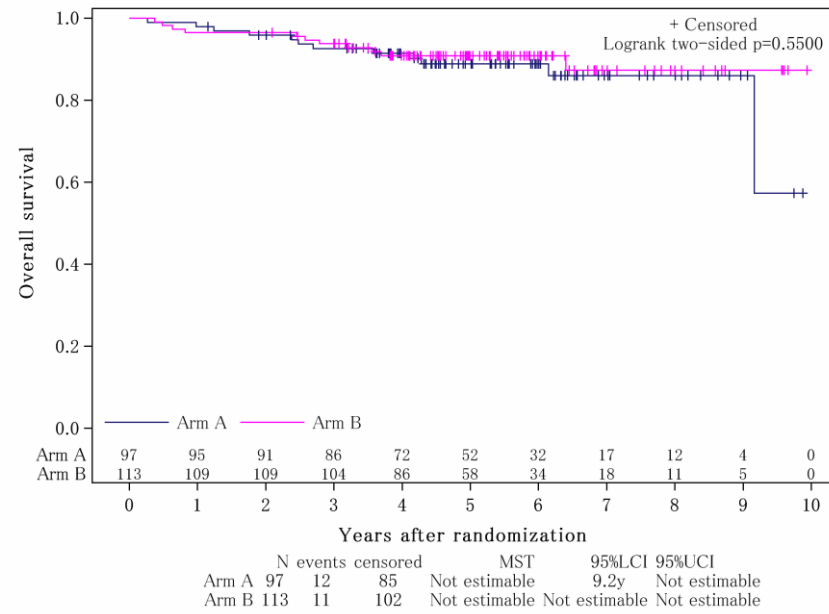

Low risk

Figure S2A

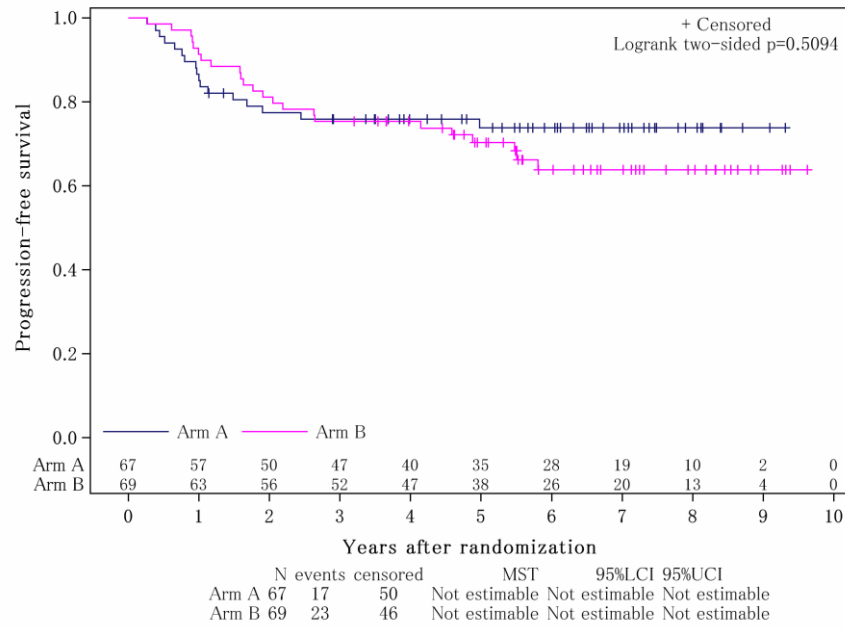

Figure S2B

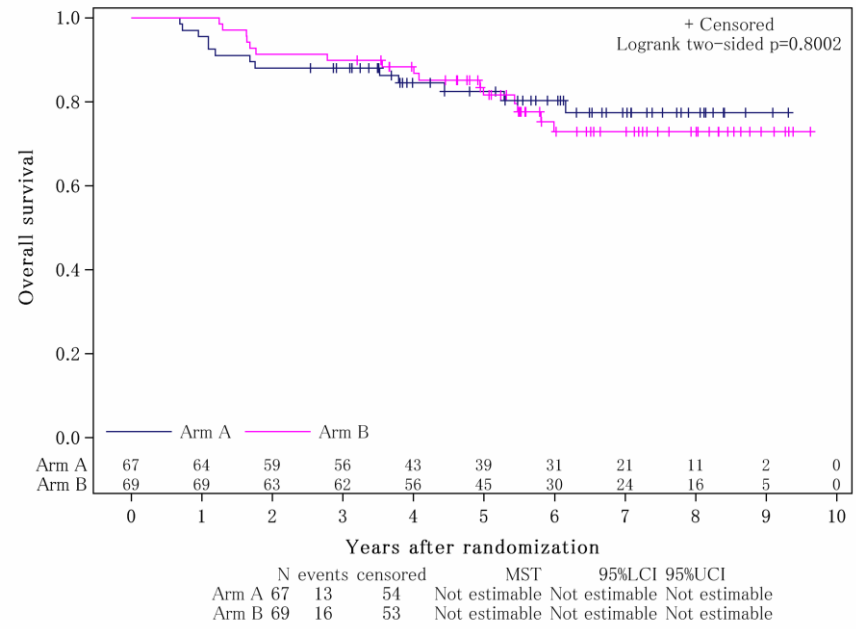

Low-intermediate risk

Figure S3A

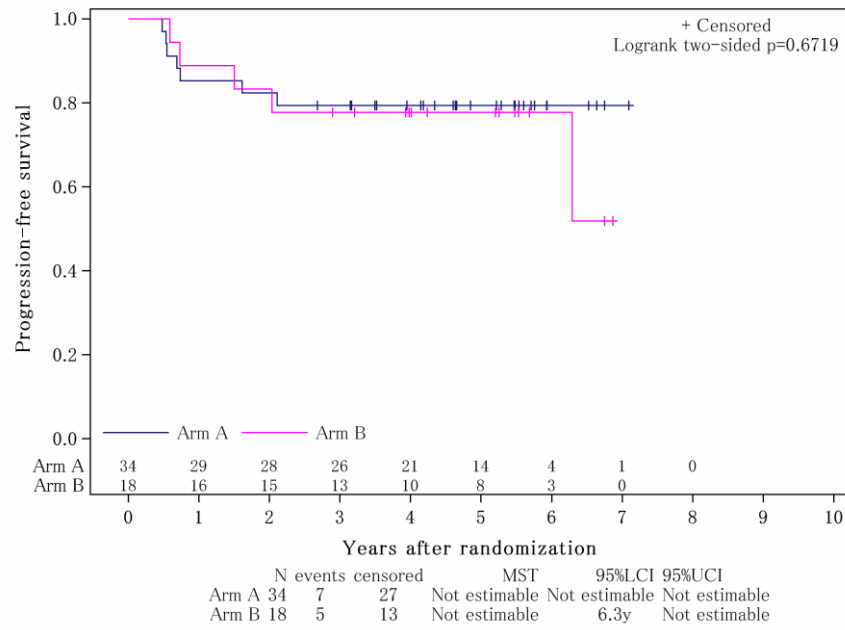

Figure S3B

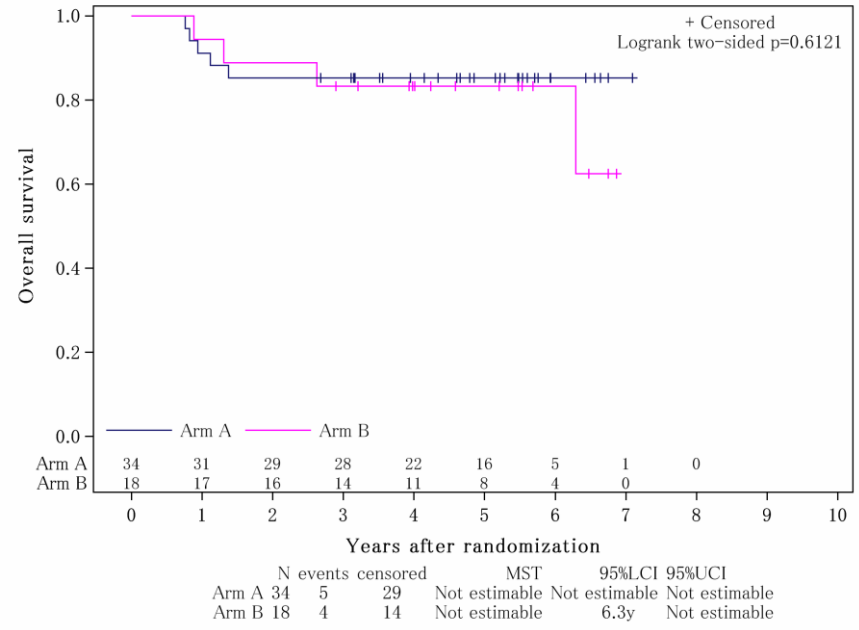

High-intermediate risk

Figure S4A

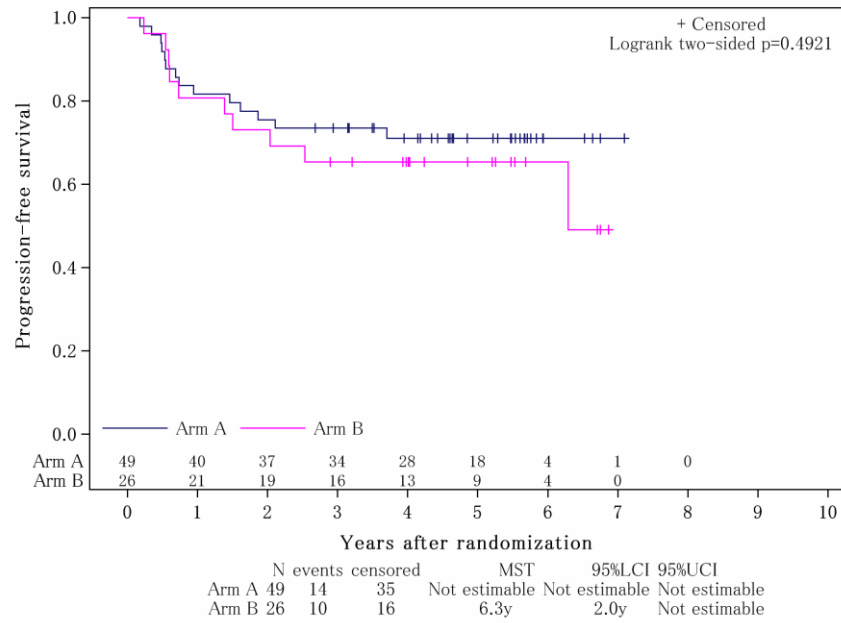

Figure S4B

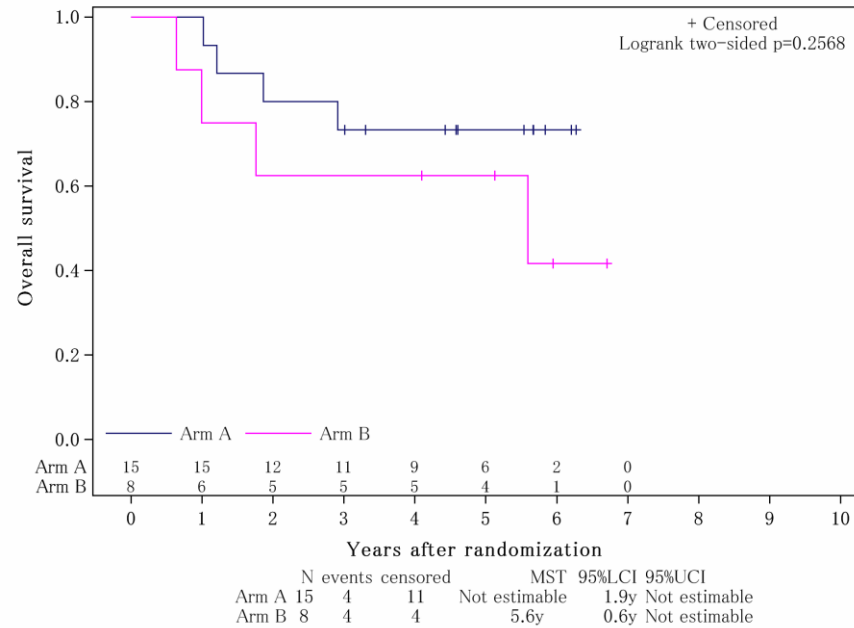

High risk

R-CHOP, rituximab, cyclophosphamide, doxorubicin, vincristine, and prednisolone; RW-CHOP, weekly rituximab, cyclophosphamide, doxorubicin, vincristine, and prednisolone; IPI, International Prognostic Index

**Supplemental table: patients characteristics by gender**

|                           | R-CHOP<br>n=213 |                | RW-CHOP<br>n=208 |                | total<br>n=421 |                 |
|---------------------------|-----------------|----------------|------------------|----------------|----------------|-----------------|
|                           | male<br>n=116   | female<br>n=97 | male<br>n=116    | female<br>n=92 | male<br>n=232  | female<br>n=189 |
| B symptom present         | 14              | 11             | 19               | 8              | 33             | 19              |
| Bulky mass ( $\geq 5$ cm) | 62              | 39             | 45               | 48             | 107            | 87              |
| Age                       |                 |                |                  |                |                |                 |
| $\leq 60$ years           | 49              | 49             | 47               | 49             | 96             | 98              |
| $\geq 61$ years           | 67              | 48             | 69               | 43             | 136            | 91              |
| LDH > U.N.L               | 58              | 52             | 45               | 39             | 103            | 91              |
| ECOG PS                   |                 |                |                  |                |                |                 |
| 0-1                       | 112             | 95             | 113              | 89             | 225            | 184             |
| 2                         | 4               | 2              | 3                | 3              | 7              | 5               |
| Ann Arbor                 |                 |                |                  |                |                |                 |
| I                         | 11              | 20             | 18               | 16             | 29             | 36              |
| II                        | 42              | 28             | 52               | 37             | 94             | 65              |
| III                       | 33              | 24             | 20               | 22             | 53             | 46              |
| IV                        | 30              | 25             | 26               | 17             | 56             | 42              |
| Extranodal sites $\geq 2$ | 15              | 14             | 10               | 6              | 25             | 20              |
| IPI                       |                 |                |                  |                |                |                 |
| Low                       | 50              | 47             | 61               | 52             | 111            | 99              |
| Low-Intermediate          | 39              | 28             | 43               | 26             | 82             | 54              |
| High-Intermediate         | 18              | 16             | 7                | 11             | 25             | 27              |
| High                      | 9               | 6              | 5                | 3              | 14             | 9               |

Abbreviations: ECOG, Eastern Cooperative Oncology Group; PS,

Performance Status; LDH, Lactate Dehydrogenase; U.N.L, Upper Normal

Limit; IPI, International Prognostic Index

Study participants: Drs. Mitsutoshi Kurosawa (Hokkaido Cancer center Sapporo); Shuichi Ota (Sapporo Hokuyu Hospital, Sapporo); Hideo Harigae (Tohoku University, Sendai); Naoto Takahashi (Akita University, Akita); Shin Matsuda (Ohta Nishinouchi Hospital, Koriyama); Akihiko Yokohama (Gunma University, Maebashi); Hirofumi Kobayashi (Saitama Cancer Center, Ina); Naoki Takahashi (Saitama Medical Center, Kawagoe); Yosuke Minami (National Cancer Center East, Kashiwa); Kyoya Kumagai (Chiba Cancer Center, Chiba); Koji Izutsu (National Cancer Center, Tokyo), Nobuyuki Takayama (Kyorin University, Tokyo); Kazuma Ohyashiki (Tokyo Medical University, Tokyo); Tatsu Shimoyama (Tokyo Metropolitan Komagome Hospital, Tokyo); Takashi Shimada (Jikei University School of Medicine, Tokyo); Yutaro Kamiyama (Jikei University Daisan Hospital, Komae); Masahiro Yokoyama (Cancer Institute Hospital, Tokyo) ; Kensuke Usuki (NTT Medical Center, Tokyo); Shuichi Mizuta (Kanazawa Medical University, Kanazawa); Takahiro Yamauchi (University of Fukui, Fukui);

Takaaki Ono (Hamamatsu University School of Medicine, Hamamatsu);  
Harumi Kato (Aichi Cancer Center, Nagoya); Kazuyuki Shimada (Nagoya  
University, Nagoya); Shigeru Kusumoto (Nagoya City University, Nagoya);  
Ichiro Hanamura (Aichi Medical University, Nagakute); Yoshitoyo Kagami  
(Toyota Kosei Hospital, Toyota); Motoko Yamaguchi (Mie University, Tsu);  
Tsutomu Kobayashi (Kyoto Prefectural University School of Medicine,  
Kyoto); Hiroshi Gomyo (Hyogo Cancer Center, Akashi); Katsuto Takenaka  
(Ehime University, Shitsukawa); Choi Ilseung (Kyusyu Cancer Center,  
Fukuoka); Hidenori Sasaki (Fukuoka University, Fukuoka); Satoshi  
Yamasaki (Kyusyu Medical Center, Fukuoka); Junichi Tsukada (University  
of Occupational and Environmental Health, Kitakyusyu); Shinya Kimura  
(Saga University, Saga); Yukimi Moriuchi (Sasebo City General Hospital,  
Sasebo); Yasushi Miyazaki (Nagasaki University, Nagasaki); Hiro Tatetsu  
(Kumamoto University, Kumamoto); Toshiro Kawakita (Kumamoto Medical  
Center, Kumamoto); Eiichi Otsuka (Oita Prefectural Hospital, Oita); Kenji



Ishizuka (Kagoshima University, Kagoshima); Yoshikiyo Ito (Imamura  
General Hospital, Kagoshima)
